# Supplementary material
Source: Elsevier journal article supplement (https://www.sciencedirect.com/science/article/pii/S1699258X2030111X)
Supplement: mmc1 [file S1699258X2030111X:mmc1.pdf]

## ANEXOS

### Anexo 1. Tabla de estudios eliminados.

| Estudio                  | Razones de exclusión                                                          |
|--------------------------|-------------------------------------------------------------------------------|
| Conway, 2017             | Es un artículo de revisión                                                    |
| Inokuma, 2008            | No incluido en PICO (recomendaciones para evitar toxicidad pulmonar por LEF). |
| Johnson, 2017            | Es un artículo de revisión                                                    |
| Umi, 2013                | Estudio abierto de EPID-AR tratada con GC y Tacrólimus, sin resultados        |
| Kelly, 2008              | Es un artículo de revisión                                                    |
| Morisset, 2019           | Es un artículo de revisión                                                    |
| Solomon, 2019            | Artículo sobre el diseño del estudio. No resultados                           |
| Spagnolo, 2017           | Es un artículo de revisión sobre FPI. No entra en PICO                        |
| Tokuda, 2017             | Consenso de práctica clínica                                                  |
| Vassallo, 2004           | Revisión no sistemática                                                       |
| Wallace, 2016            | Revisión no sistemática sobre la gestión pacientes con EPID en EAS            |
| Wollin, 2019             | Artículo de opinión sobre antifibróticos en EPID de EAS                       |
| Wu, 2019                 | No incluido en PICO (Outcome: parámetro de laboratorio)                       |
| Edgeworth, 2011          | Descripción de 3 casos de EPID en "enfermedades reumatológicas"               |
| Hirabara, 2015           | No incluido en PICO (Outcome: respuesta AR no EPID)                           |
| Kim, 2016                | No incluido en PICO (Outcome: A. adverso y supervivencia fármaco)             |
| Setoguchi, 2017          | No incluido en PICO (Outcome: práctica clínica del reumatólogo)               |
| Barnes, 2018             | No incluido en PICO (Outcome: Resultados de CFM en EAS, sin especificar)      |
| Kelly, 2014              | No incluido en PICO (Factores asociados al desarrollo de EPID)                |
| Saldarriaga-Rivera, 2018 | No incluido en PICO (no especifica resultados)                                |
